# Supplementary material
Source: MDPI journal article supplement (https://www.mdpi.com/1996-1073/16/1/543)
Supplement: s1 [file s1]

## Supplementary Materials

**Table S1.** Monthly data on the reference river water heat sources.

| Province            | Region      | Jan | Feb | Mar  | Apr  | May  | Jun  | Jul  | Aug  | Sep  | Oct  | Nov  | Dec |
|---------------------|-------------|-----|-----|------|------|------|------|------|------|------|------|------|-----|
| Chung-cheong-buk-do | Jecheon     | 3.1 | 3.6 | 7.5  | 12.8 | 18.6 | 22.7 | 23.2 | 24.4 | 21.5 | 16.9 | 10.0 | 4.6 |
|                     | Chungju     | 3.5 | 3.8 | 6.8  | 11.3 | 16.5 | 20.9 | 22.6 | 24.4 | 22.2 | 18.1 | 12.8 | 6.8 |
|                     | Ceongju     | 3.9 | 4.6 | 8.9  | 14.1 | 19.3 | 23.6 | 25.2 | 25.9 | 22.7 | 17.7 | 11.7 | 6.4 |
|                     | Boeun       | 2.1 | 2.6 | 6.3  | 11.8 | 17.9 | 22.9 | 23.2 | 25.5 | 21.9 | 17.1 | 11.4 | 4.6 |
|                     | Yeongdong   | 2.4 | 3.2 | 7.7  | 12.7 | 19.0 | 24.0 | 24.0 | 25.6 | 22.0 | 17.1 | 10.7 | 4.0 |
|                     | Cheonan     | 3.8 | 4.6 | 8.4  | 13.8 | 19.9 | 24.2 | 26.1 | 26.9 | 22.6 | 17.7 | 12.3 | 6.2 |
| Jeolla-buk-do       | Namwon      | 2.8 | 4.1 | 8.7  | 14.2 | 20.0 | 23.8 | 24.6 | 25.4 | 21.7 | 16.5 | 10.7 | 5.0 |
|                     | Imsil       | 2.9 | 3.6 | 7.8  | 13.0 | 19.3 | 22.9 | 23.6 | 24.9 | 21.9 | 17.2 | 11.1 | 5.8 |
|                     | Gunsan      | 3.6 | 4.9 | 9.4  | 15.6 | 20.5 | 24.8 | 27.5 | 28.9 | 24.5 | 19.0 | 12.4 | 6.1 |
|                     | Jeonju      | 4.5 | 4.9 | 9.3  | 14.7 | 19.7 | 23.5 | 25.7 | 27.5 | 24.1 | 19.5 | 12.9 | 7.2 |
|                     | Jeongeup    | 3.9 | 4.3 | 8.4  | 13.7 | 19.0 | 22.4 | 25.2 | 27.2 | 23.4 | 19.4 | 12.9 | 6.7 |
|                     | Buan        | 3.9 | 4.4 | 8.4  | 14.7 | 19.9 | 23.3 | 25.8 | 28.1 | 23.9 | 19.1 | 12.6 | 6.1 |
|                     | Jangsu      | 3.5 | 4.4 | 7.6  | 12.3 | 17.9 | 20.9 | 22.5 | 23.1 | 19.8 | 15.0 | 10.2 | 5.0 |
| Gangwon-do          | Pyeongchang | 1.6 | 2.4 | 5.3  | 11.1 | 17.7 | 22.8 | 21.4 | 23.4 | 19.7 | 15.0 | 8.2  | 2.5 |
|                     | Yeongwol    | 2.0 | 3.6 | 7.7  | 11.8 | 18.1 | 22.3 | 21.8 | 23.5 | 20.1 | 15.4 | 8.7  | 3.9 |
|                     | Taebaek     | 1.8 | 2.8 | 7.2  | 9.4  | 16.0 | 19.4 | 19.1 | 20.7 | 17.7 | 13.3 | 8.9  | 3.3 |
|                     | Donghae     | 4.9 | 5.1 | 7.5  | 11.5 | 16.2 | 20.0 | 20.2 | 22.2 | 18.9 | 14.8 | 10.8 | 5.8 |
|                     | Hongcheon   | 1.8 | 2.1 | 7.2  | 13.0 | 19.1 | 24.3 | 24.2 | 25.6 | 21.7 | 17.3 | 10.5 | 3.6 |
|                     | Wonju       | 2.5 | 4.0 | 8.6  | 13.5 | 18.6 | 24.1 | 24.3 | 25.9 | 24.4 | 16.7 | 10.4 | 4.7 |
|                     | Cheolwon    | 2.9 | 3.0 | 7.6  | 12.0 | 17.4 | 22.7 | 22.9 | 24.2 | 21.0 | 16.4 | 10.0 | 5.1 |
|                     | Chuncheon   | 4.0 | 4.4 | 6.9  | 10.6 | 14.3 | 18.0 | 20.7 | 22.3 | 20.5 | 16.8 | 12.4 | 6.7 |
|                     | Inje        | 0.7 | 1.4 | 6.2  | 11.4 | 18.1 | 24.3 | 22.4 | 25.6 | 20.1 | 14.4 | 7.0  | 2.3 |
|                     | Sokcho      | 4.6 | 5.5 | 8.7  | 13.4 | 16.9 | 21.0 | 22.4 | 24.3 | 20.2 | 16.0 | 11.2 | 6.2 |
|                     | Gangneung   | 4.8 | 5.6 | 9.2  | 14.5 | 18.1 | 21.0 | 21.1 | 23.4 | 20.0 | 15.0 | 9.5  | 6.1 |
| Gyeonggi-do         | Icheon      | 3.5 | 4.6 | 9.3  | 14.8 | 20.2 | 24.7 | 25.1 | 26.5 | 22.9 | 17.8 | 11.5 | 5.8 |
|                     | Yangpyeong  | 2.5 | 3.5 | 7.5  | 12.9 | 18.7 | 23.5 | 23.3 | 25.0 | 21.9 | 17.1 | 10.8 | 4.8 |
|                     | Suwon       | 6.2 | 7.1 | 10.3 | 15.8 | 20.9 | 25.3 | 26.1 | 26.7 | 24.3 | 19.8 | 13.9 | 7.9 |
|                     | Dongducheon | 1.8 | 2.8 | 6.6  | 12.8 | 18.8 | 24.2 | 24.2 | 25.3 | 23.0 | 17.6 | 11.2 | 4.7 |
|                     | Ganghwa     | 2.5 | 3.3 | 6.8  | 13.3 | 18.8 | 23.1 | 24.6 | 25.4 | 23.1 | 18.2 | 13.9 | 5.3 |
| Jeolla-nnam-do      | Jangheung   | 3.8 | 4.5 | 8.9  | 13.9 | 18.6 | 22.7 | 24.3 | 26.9 | 23.0 | 18.3 | 12.2 | 6.2 |
|                     | Yeosu       | 5.4 | 5.2 | 9.5  | 13.7 | 17.8 | 21.1 | 23.0 | 25.2 | 22.9 | 20.0 | 14.2 | 8.6 |
|                     | Haenam      | 4.2 | 4.5 | 9.3  | 14.4 | 19.5 | 23.1 | 25.0 | 26.8 | 22.8 | 18.3 | 12.0 | 6.3 |
|                     | Wando       | 2.6 | 5.2 | 8.8  | 14.4 | 18.9 | 25.3 | 24.7 | 27.8 | 24.2 | 18.5 | 13.4 | 6.0 |
|                     | Goheung     | 6.3 | 6.8 | 10.9 | 15.2 | 20.1 | 21.6 | 24.2 | 26.4 | 23.4 | 20.8 | 14.2 | 9.0 |

|                     |            |     |     |      |      |      |      |      |      |      |      |      |     |
|---------------------|------------|-----|-----|------|------|------|------|------|------|------|------|------|-----|
|                     | Mokpo      | 4.5 | 4.6 | 8.9  | 15.1 | 20.2 | 24.3 | 26.1 | 28.5 | 24.4 | 18.8 | 13.1 | 7.1 |
| Chung-cheong-nam-do | Geumsan    | 2.7 | 3.8 | 8.0  | 13.2 | 19.4 | 23.6 | 24.1 | 25.5 | 21.5 | 16.5 | 10.7 | 5.3 |
|                     | Buyeo      | 2.9 | 3.9 | 8.6  | 14.6 | 20.3 | 24.3 | 25.8 | 27.8 | 23.5 | 18.5 | 12.1 | 5.4 |
|                     | Seosan     | 3.1 | 3.5 | 8.5  | 14.4 | 20.3 | 24.4 | 25.9 | 28.0 | 24.1 | 19.3 | 13.3 | 6.0 |
|                     | Boryeong   | 3.8 | 3.8 | 8.3  | 14.1 | 19.3 | 22.7 | 25.1 | 27.3 | 23.6 | 19.3 | 13.0 | 6.5 |
| Gyeong-sang buk-do  | Bonghwa    | 1.8 | 3.3 | 8.0  | 12.9 | 19.4 | 23.1 | 22.3 | 23.6 | 19.6 | 14.6 | 8.5  | 3.5 |
|                     | Uljin      | 3.0 | 4.5 | 8.5  | 12.0 | 18.4 | 22.1 | 22.9 | 22.0 | 18.5 | 14.7 | 9.2  | 4.4 |
|                     | Andong     | 4.4 | 5.2 | 9.4  | 13.8 | 18.3 | 21.5 | 23.5 | 25.1 | 22.6 | 18.0 | 12.3 | 6.5 |
|                     | Yeongju    | 3.6 | 5.7 | 10.0 | 15.2 | 20.6 | 24.5 | 25.0 | 26.7 | 22.8 | 17.8 | 11.8 | 6.0 |
|                     | Uiseong    | 3.4 | 4.8 | 9.9  | 14.8 | 20.6 | 24.7 | 25.5 | 27.3 | 23.5 | 18.0 | 11.6 | 5.4 |
|                     | Pohang     | 5.7 | 6.9 | 10.4 | 16.1 | 19.9 | 23.2 | 24.4 | 25.1 | 22.3 | 17.7 | 12.9 | 7.6 |
|                     | Mungyeong  | 3.3 | 5.5 | 9.7  | 14.8 | 20.2 | 25.8 | 24.7 | 27.8 | 23.1 | 18.1 | 11.4 | 5.0 |
|                     | Gumi       | 4.4 | 5.5 | 10.5 | 15.3 | 20.7 | 25.1 | 25.6 | 27.7 | 23.2 | 18.6 | 12.4 | 6.5 |
|                     | Yeongcheon | 4.6 | 6.1 | 11.1 | 14.5 | 20.2 | 22.6 | 24.1 | 25.9 | 21.9 | 18.2 | 12.6 | 6.8 |
|                     | Yeongdeok  | 5.2 | 9.2 | 12.1 | 15.2 | 20.6 | 23.9 | 25.1 | 25.4 | 22.1 | 16.9 | 12.9 | 8.2 |
| Gyeong-sang nam-do  | 大大         | 4.0 | 4.9 | 9.4  | 14.3 | 19.7 | 22.9 | 24.3 | 26.4 | 23.2 | 18.6 | 12.9 | 6.7 |
|                     | Geochang   | 3.5 | 5.1 | 9.6  | 14.7 | 20.4 | 24.9 | 24.9 | 25.9 | 21.9 | 16.8 | 11.0 | 5.9 |
|                     | Namhae     | 4.4 | 5.3 | 9.9  | 14.7 | 19.9 | 23.7 | 24.7 | 27.0 | 22.7 | 17.5 | 12.0 | 6.0 |
|                     | Jinju      | 4.3 | 5.5 | 10.4 | 15.3 | 20.6 | 24.8 | 25.9 | 27.8 | 24.1 | 19.5 | 13.9 | 7.3 |
|                     | Sancheong  | 3.4 | 4.5 | 9.3  | 13.6 | 19.6 | 24.1 | 24.0 | 25.8 | 22.6 | 18.1 | 11.6 | 6.3 |
|                     | Changwon   | 5.2 | 6.0 | 10.2 | 15.2 | 20.2 | 24.5 | 25.3 | 28.4 | 24.3 | 19.2 | 14.3 | 7.8 |
|                     | Miryang    | 4.5 | 5.9 | 11.2 | 16.3 | 21.4 | 25.2 | 26.4 | 28.3 | 24.0 | 19.2 | 13.2 | 6.8 |
|                     | Ulsan      | 5.4 | 5.8 | 9.7  | 14.7 | 19.6 | 23.0 | 24.9 | 27.4 | 22.6 | 18.5 | 13.6 | 7.0 |
|                     | Geoje      | 6.6 | 7.0 | 8.8  | 14.7 | 20.0 | 22.9 | 23.2 | 25.7 | 23.7 | 19.2 | 13.8 | 9.6 |
